# Supplementary material for: Association of High Vitamin D Status with Low Circulating Thyroid-Stimulating Hormone Independent of Thyroid Hormone Levels in Middle-Aged and Elderly Males
Source: PubMed Central journal article supplement (PMC3947886; doi:10.1155/2014/631819), 2014-02-16
Supplement: 631819.f1.pdf [file 631819.f1.pdf]

SUPPLEMENTARY TABLE 1. DETERMINANTS OF STRONG POSITIVE THYROID ANTIBODIES

|                                  | Serum TgAb           |          | Serum TPOAb          |          | Serum TgAb and/or TPOAb |          |
|----------------------------------|----------------------|----------|----------------------|----------|-------------------------|----------|
|                                  | Adjusted OR (95% CI) | P -value | Adjusted OR (95% CI) | P -value | Adjusted OR (95% CI)    | P -value |
| Age (years)                      | 0.997(0.958-1.039)   | 0.901    | 0.964(0.928-1.002)   | 0.065    | 0.983(0.952-1.016)      | 0.310    |
| Male sex                         | 1.622(0.650-4.045)   | 0.300    | 1.310(0.566-3.028)   | 0.528    | 1.357(0.674-2.733)      | 0.392    |
| BMI (kg/m <sup>2</sup> )         | 1.052(0.954-1.161)   | 0.307    | 1.016(0.922-1.120)   | 0.745    | 1.051(0.969-1.139)      | 0.230    |
| Smoking status                   | 0.612(0.176-2.129)   | 0.440    | 0.635(0.218-1.855)   | 0.407    | 0.721(0.296-1.755)      | 0.471    |
| Presence of vitamin D deficiency | 2.801(1.141-6.878)   | 0.025    | 2.833(1.231-6.523)   | 0.014    | 2.168(1.144-4.108)      | 0.018    |

SUPPLEMENTARY TABLE 2. THE RELATIONSHIP BETWEEN VITAMIN D AND TSH BASED ON THE POSITIVITY OF SERUM ANTIBODIES

|                         | Serum TgAb     |                 | Serum TPOAb    |                 | Serum TgAb and/or TPOAb |                 |
|-------------------------|----------------|-----------------|----------------|-----------------|-------------------------|-----------------|
|                         | Positive (138) | Negative (1219) | Positive (152) | Negative (1127) | Positive (213)          | Negative (1010) |
| Correlation Coefficient | -0.102         | -0.080          | -0.096         | -0.092          | -0.070                  | -0.096          |
| P-value                 | 0.234          | 0.005           | 0.240          | 0.002           | 0.309                   | 0.002           |
